# Supplementary material
Source: publisher site journal article supplement (https://www.dovepress.com/article/311347)
Supplement: Supplementary file 1 [file get_supplementary_file.php]

**Supplementary Figure legends**

**Figure 1:** Flowchart of patient selection in this study.

**Figure 2:** Kaplan–Meier analysis of OS of GC patients at different TNM stage according to the FPNI score. (A) Association of the FPNI score with the OS of patients with stage I-II GC. (B) Association of the FPNI score with the OS of patients with stage III-IV GC.

**Figure 3:** ROC curves of the nomogram: predicting 3-year OS (A) and 5-year (B).


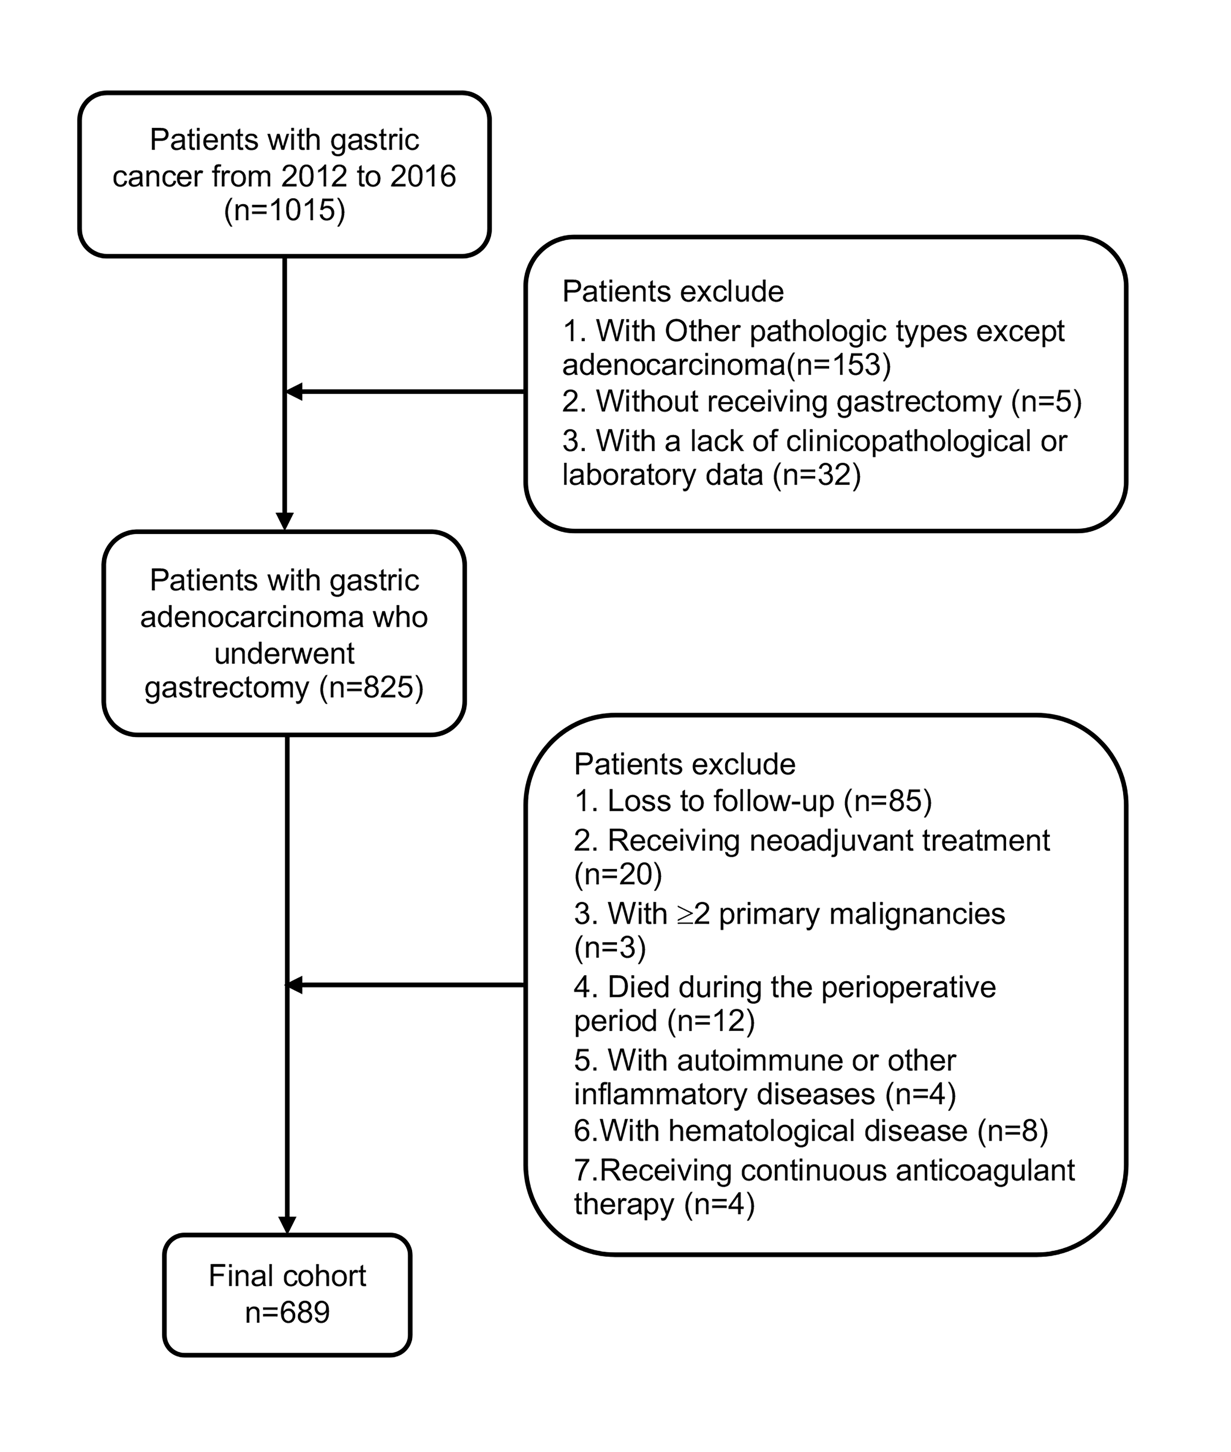
Supplementary Figure 1


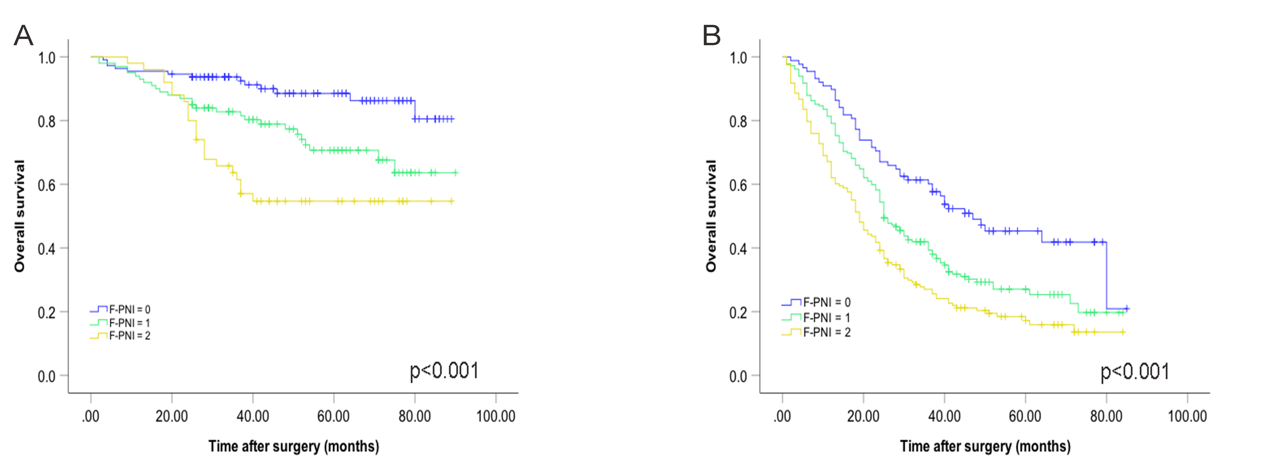


Supplementary Figure 2


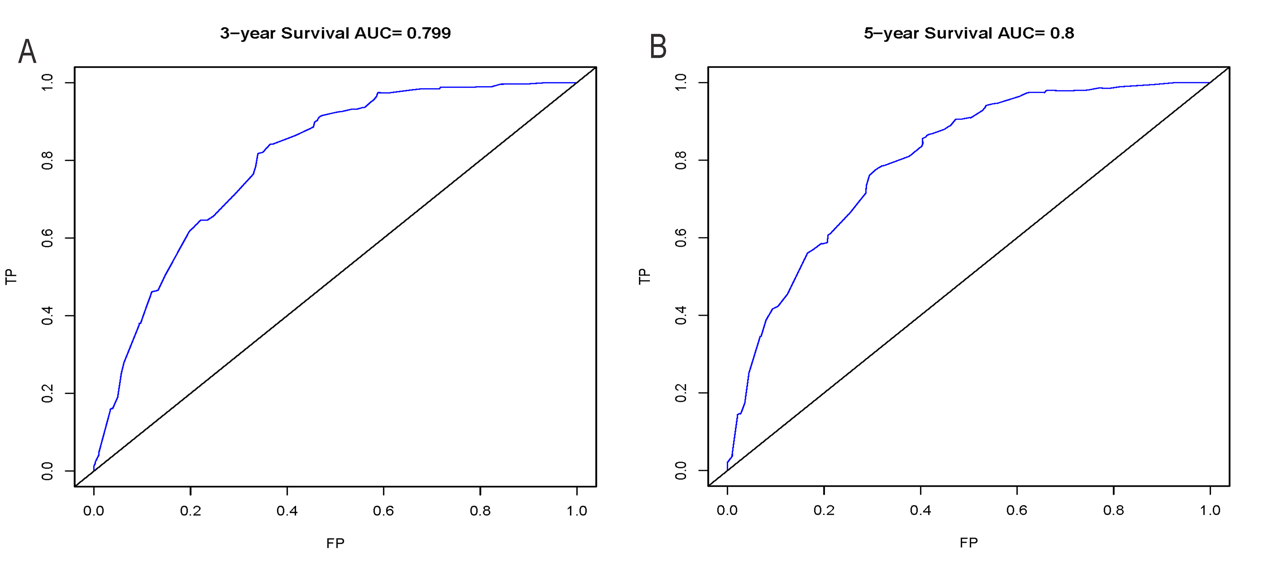


Supplementary Figure 3
